# Supplementary material for: Full use of lignocellulosic biomass for efficient synthesis of l-tyrosine and its analogues by engineering microbial consortia
Source: Royal Society of Chemistry journal article supplement (doi:10.1039/d3gc05013k), 2024-01-01
Supplement: d3gc05013k1.pdf [file d3gc05013k1.pdf]

**Supplementary information**  
**Full use of lignocellulosic biomass in efficient synthesis of  
L-tyrosine and its analogues by engineering microbial  
consortia**

Mingtao Zhao, Xiaofeng Wu, Yankai Tao, Yi Xiao\*

M. Zhao, X. Wu, Y. Tao, Y. Xiao

State Key Laboratory of Microbial Metabolism, School of Life Sciences and Biotechnology, Shanghai Jiao Tong University, 800 Dongchuan RD. Minhang District, Shanghai 200240, China.

Emails:

M. Zhao: [taoaige@sjtu.edu.cn](mailto:taoaige@sjtu.edu.cn)

X. Wu: [wxf991122@sjtu.edu.cn](mailto:wxf991122@sjtu.edu.cn)

Y. Tao: [taoyankai@sjtu.edu.cn](mailto:taoyankai@sjtu.edu.cn)

\*Corresponding author. Y. Xiao: [yi\\_xiao@sjtu.edu.cn](mailto:yi_xiao@sjtu.edu.cn)

## List of Figures

**Fig. S1** Biocatalytic cascades towards the synthesis of L-tyrosine derivatives from lignin-derived phenolics and pyruvate produced from glucose-xylose mixtures.

**Fig. S2** Optimization of pyruvate synthesis within different strains containing different sgRNAs.

**Fig. S3** Pyruvate synthesis using xylose-selective strains.

**Fig. S4** Optimization of pyruvate synthesis using the SPYR13-SPYR15 consortium with both of different inoculation ratios of SPYR13 to SPYR15 and different concentrations of glucose and xylose.

**Fig. S5** The time course for the accumulation of acetic acid during the process of producing pyruvate with the SPYR13–SPYR15 consortium.

**Fig. S6** Optimization of pyruvate synthesis using the SGXP01-SGXP02 consortium with different inoculation ratios and 20 g L<sup>-1</sup> glucose-xylose mixtures (13.5 g L<sup>-1</sup> glucose and 6.5 g L<sup>-1</sup> xylose).

**Fig. S7** The time course for the synthesis of **1a** from 5.5 g L<sup>-1</sup> **2a** with the GXP system.

**Fig. S8** Comparison of different sources of decarboxylases to catalyze the decarboxylation of lignin-derived hydroxybenzoic acids to phenol and its analogues.

**Fig. S9** Optimization of pyruvate synthesis using the SGXP05-SGXP06 consortium with different inoculation ratios and 20 g L<sup>-1</sup> glucose-xylose mixtures (13.5 g L<sup>-1</sup> glucose and 6.5 g L<sup>-1</sup> xylose).

**Fig. S10** Optimization of pyruvate synthesis using the SGXP07-SGXP02 consortium with different inoculation ratios and 20 g L<sup>-1</sup> glucose-xylose mixtures (13.5 g L<sup>-1</sup> glucose and 6.5 g L<sup>-1</sup> xylose).

**Fig. S11** Optimization of pyruvate synthesis using the SGXP08-SGXP02 consortium with different inoculation ratios and 20 g L<sup>-1</sup> glucose-xylose mixtures (13.5 g L<sup>-1</sup> glucose and 6.5 g L<sup>-1</sup> xylose).

**Fig. S12** Optimization of pyruvate synthesis using the SGXP09-SGXP06 consortium with different inoculation ratios and 20 g L<sup>-1</sup> glucose-xylose mixtures (13.5 g L<sup>-1</sup> glucose and 6.5 g L<sup>-1</sup> xylose).

**Fig. S13** The effects of the different phenolics on the growth of SPYR13-SPYR15 consortium.

**Fig. S14** The entire enzymatic-chemical process to obtain the glucose-xylose mixtures and *p*-coumaric acid (**5a**) from sorghum pith.

## List of Tables

**Table S1.** Plasmids used in this study

**Table S2.** Strains used in this study

**Table S3.** N20 sequences (targeting sites) used for targeting *aceE*

**Table S4.** Conversions (%) for the formation of tyrosine derivatives employing wild-type TPL from *Citrobacter freundii*.

**Table S5.** Chemicals used in this study

**Table S6.** DNA sequences used in this study

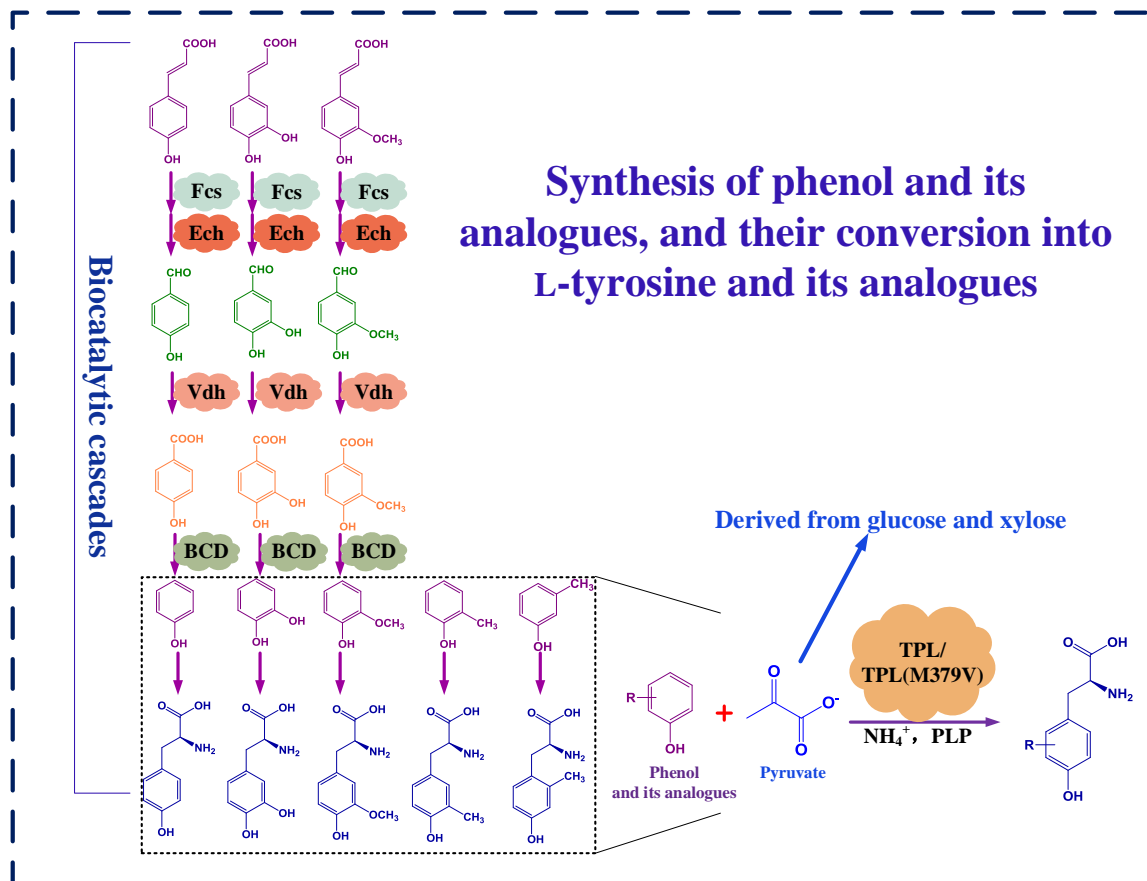

**Fig. S1** Biocatalytic cascades towards the synthesis of L-tyrosine derivatives from lignin-derived phenolics and pyruvate produced from glucose-xylose mixtures.

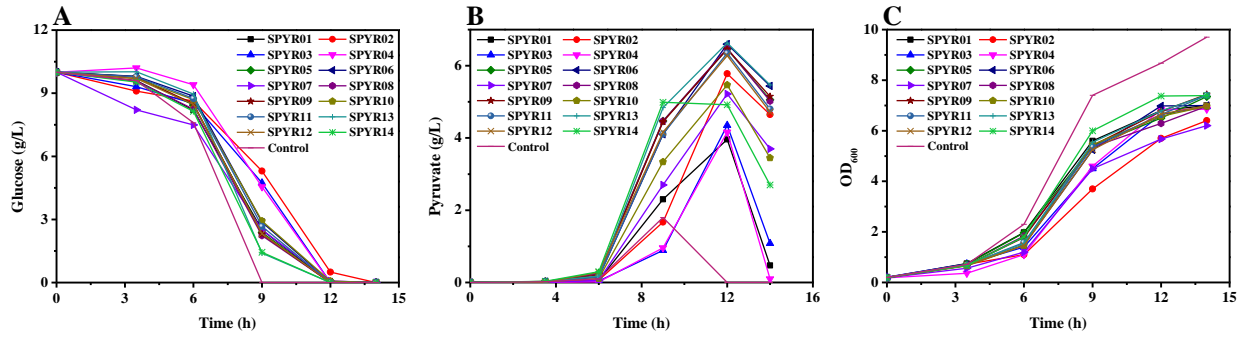

**Fig. S2** Optimization of pyruvate synthesis within different strains containing different sgRNAs. A) Glucose consumption by different strains. B) Pyruvate synthesis by different strains. C) Cell growth of different strains.

The colors used here are unrelated to those used elsewhere. The fermentations were started using  $10 \text{ g L}^{-1}$  glucose. When cell cultures reached an  $\text{OD}_{600}$  of 0.6,  $0.35 \text{ mg L}^{-1}$  anhydrotetracycline (aTc) was added for dCas9 expression except for the control experiments. The fermentation were finished after 14 h.

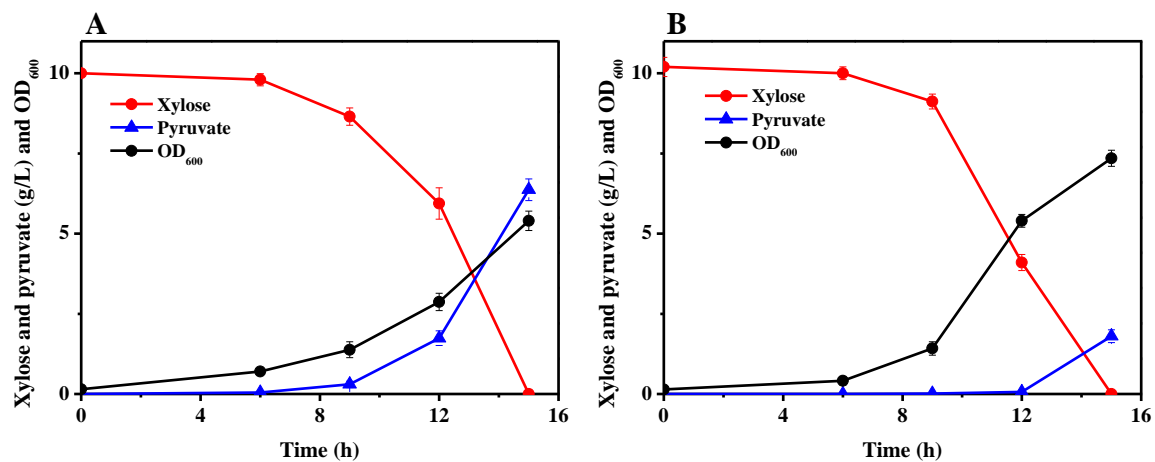

**Fig. S3** Pyruvate synthesis using xylose-selective strains. A) Pyruvate synthesis using strain SPYR15 carrying a CRISPRi system. When cell cultures reached an OD<sub>600</sub> of 0.6, 0.35 mg L<sup>-1</sup> aTc was added for dCas9 expression. B) Control experiment using strain MG74A3.

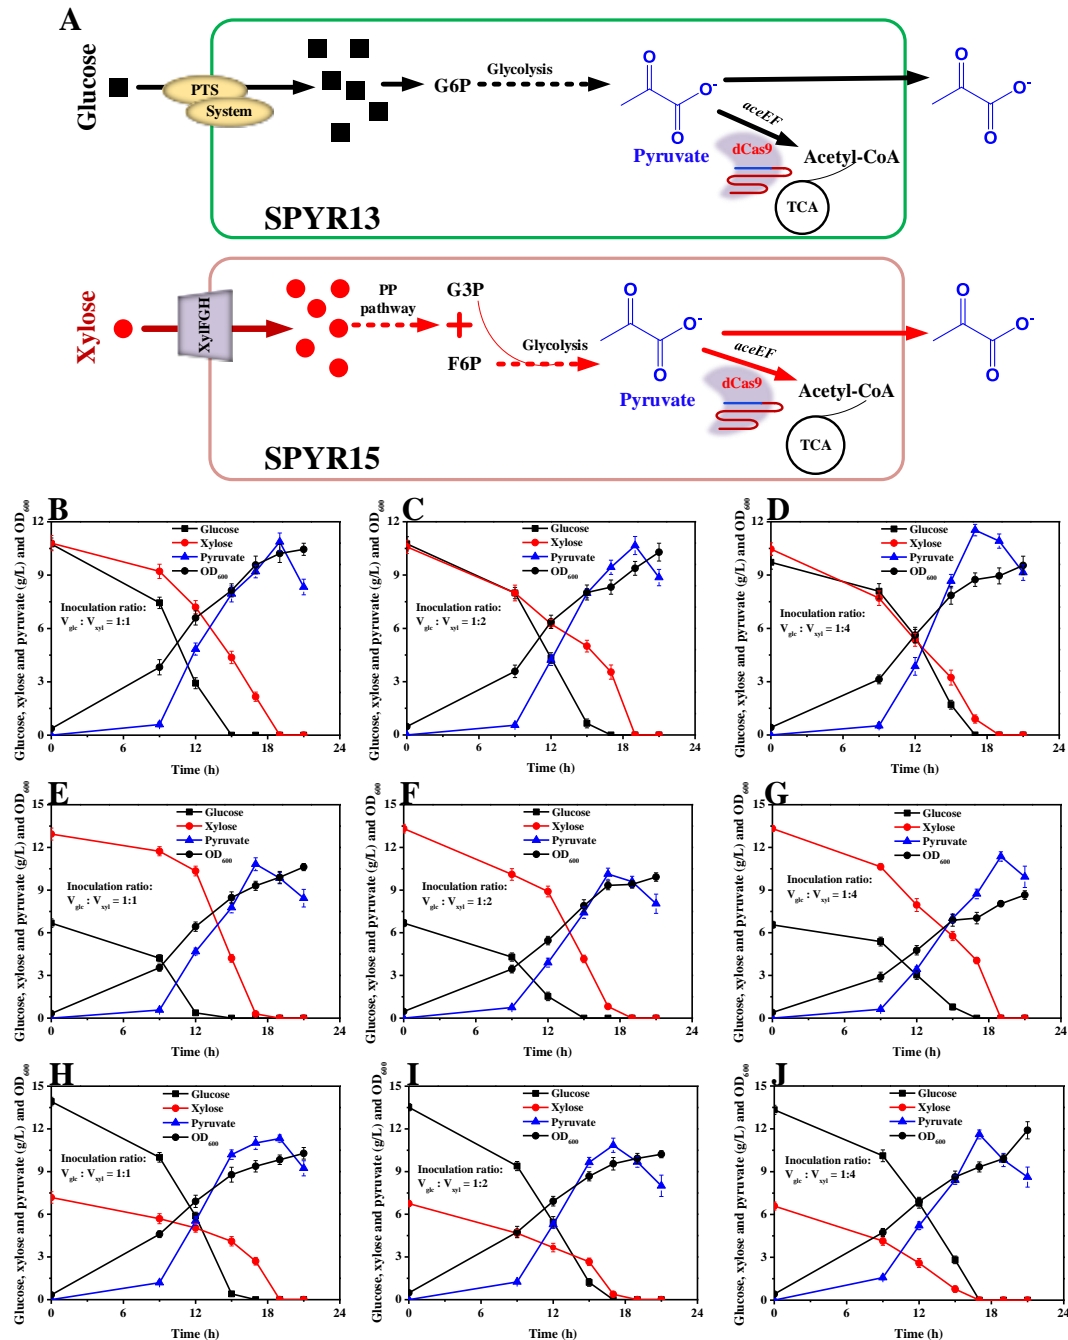

**Fig. S4** Optimization of pyruvate synthesis using the SPYR13-SPYR15 consortium with both of different inoculation ratios of SPYR13 to SPYR15 and different concentrations of glucose and xylose. A) Construction of SPYR13-SPYR15 consortium for pyruvate synthesis. The fermentations were started using 10 g L<sup>-1</sup> glucose and 10 g L<sup>-1</sup> xylose with an inoculation ratio of 1:1 (SPYR13:SPYR15) (B), 1:2 (SPYR13:SPYR15) (C) and 1:4 (SPYR13:SPYR15) (D). The fermentations were started using 6.5 g L<sup>-1</sup> glucose and 13.5 g L<sup>-1</sup> xylose with an inoculation ratio of 1:1 (SPYR13:SPYR15) (E), 1:2 (SPYR13:SPYR15) (F) and 1:4 (SPYR13:SPYR15) (G). The fermentations were started using 13.5 g L<sup>-1</sup> glucose and 6.5 g L<sup>-1</sup> xylose with an inoculation ratio of 1:1 (SPYR13:SPYR15) (H), 1:2 (SPYR13:SPYR15) (I) and 1:4 (SPYR13:SPYR15) (J). When cell cultures reached an OD<sub>600</sub> of 1.2, 0.35 mg L<sup>-1</sup> aTc was added for dCas9 expression.

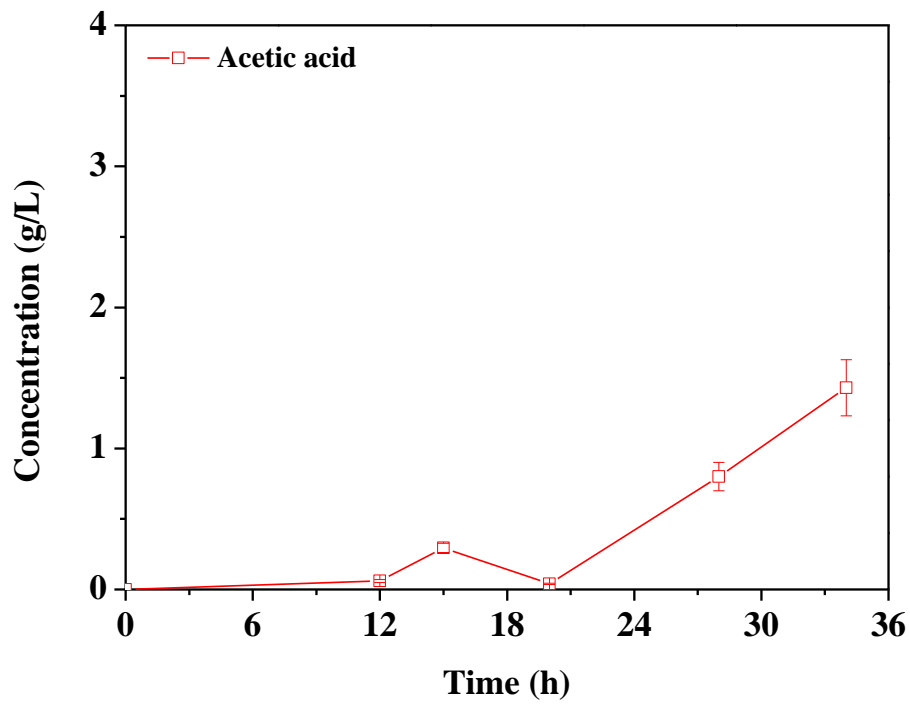

**Fig. S5** The time course for the accumulation of acetic acid during the process of producing pyruvate with the SPYR13–SPYR15 consortium.

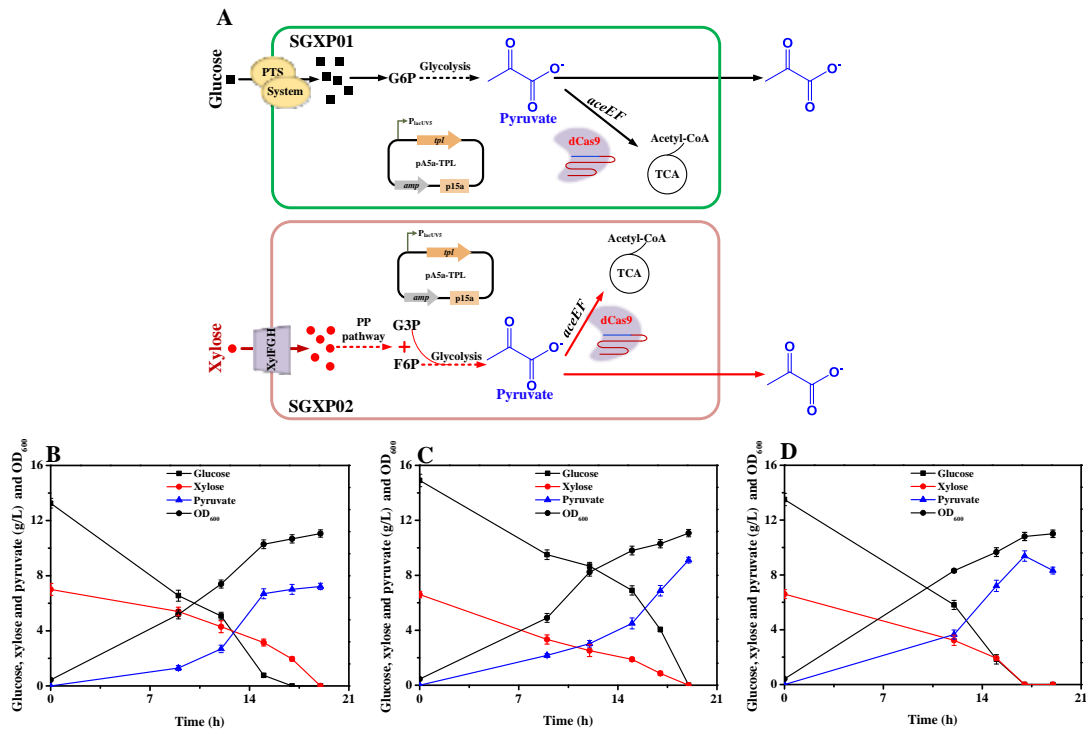

**Fig. S6** Optimization of pyruvate synthesis using the SGXP01-SGXP02 consortium with different inoculation ratios and 20 g L<sup>-1</sup> glucose-xylose mixtures (13.5 g L<sup>-1</sup> glucose and 6.5 g L<sup>-1</sup> xylose). A) Construction of SGXP01-SGXP02 consortium for pyruvate synthesis. The fermentations were started using an inoculation ratio of 1:1 (SGXP01:SGXP02) (B), 1:2 (SGXP01:SGXP02) (C) and 1:4 (SGXP01:SGXP02) (D). When cell cultures reached an OD<sub>600</sub> of 1.2, 0.35 mg L<sup>-1</sup> aTc was added for dCas9 expression.



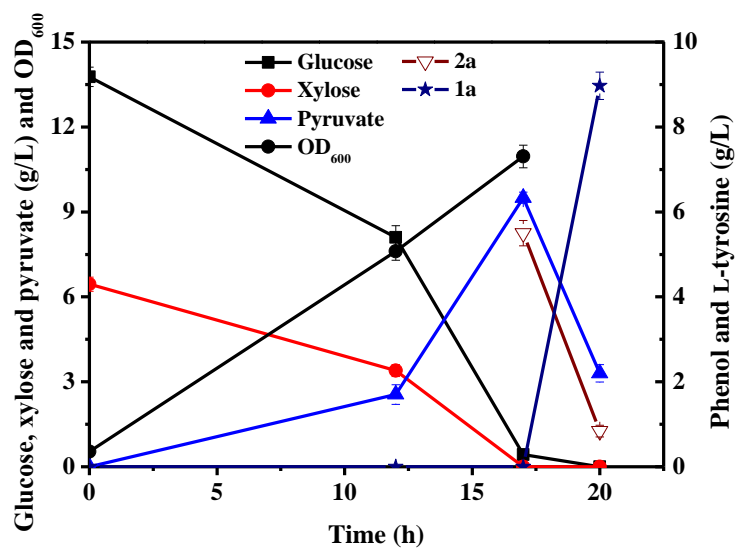

**Fig. S7** The time course for the synthesis of **1a** from  $5.5 \text{ g L}^{-1}$  **2a** with the GXP system. The fermentations were started using  $13.5 \text{ g L}^{-1}$  glucose and  $6.5 \text{ g L}^{-1}$  xylose. After 17 h of fermentation,  $5.5 \text{ g L}^{-1}$  **2a** was added with  $20 \text{ g L}^{-1}$   $\text{NH}_4\text{Cl}$  and  $0.5 \text{ mM}$  PLP to begin the synthesis of **1a**.

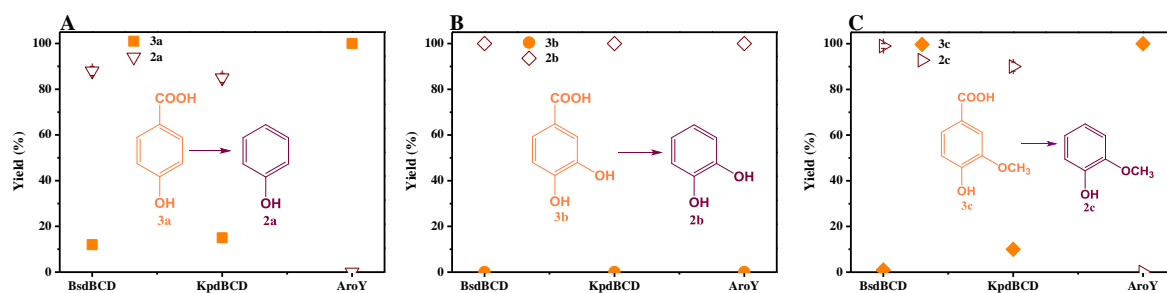

**Fig. S8** Comparison of different sources of decarboxylases to catalyze the decarboxylation of lignin-derived hydroxybenzoic acids to phenol and its analogues. A) Decarboxylation of *p*-hydroxybenzoic acid (**3a**) to produce phenol (**2a**). B) Decarboxylation of protocatechuic acid (**3b**) to produce catechol (**2b**). C) Decarboxylation of vanillic acid (**3c**) to produce guaiacol (**2c**). The genes (*BsdBCD*, *KpdBCD* and *aroY*) were cloned into plasmid pA5a and then were transformed into *E. coli* MG1655 to construct three biocatalysts. The reactions were performed in 10 mL KPi buffer with an OD<sub>600</sub> of 10 at 37 °C and 220 rpm for 1 h.

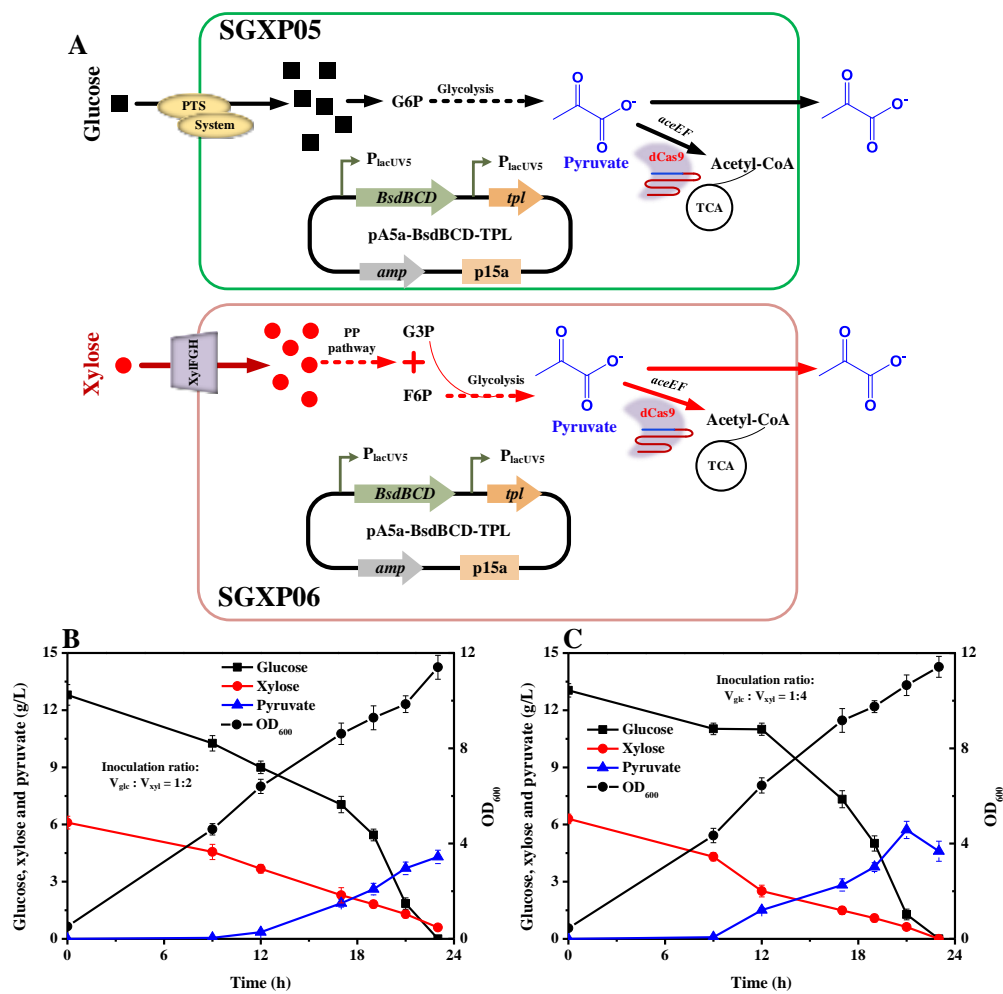

**Fig. S9** Optimization of pyruvate synthesis using the SGXP05-SGXP06 consortium with different inoculation ratios and 20 g L<sup>-1</sup> glucose-xylose mixtures (13.5 g L<sup>-1</sup> glucose and 6.5 g L<sup>-1</sup> xylose). A) Construction of SGXP05-SGXP06 consortium for pyruvate synthesis. The fermentations were started using an inoculation ratio of 1:2 (SGXP05:SGXP06) (B) and 1:4 (SGXP05:SGXP06) (C). When cell cultures reached an OD<sub>600</sub> of 1.2, 0.35 mg L<sup>-1</sup> aTc was added for dCas9 expression.

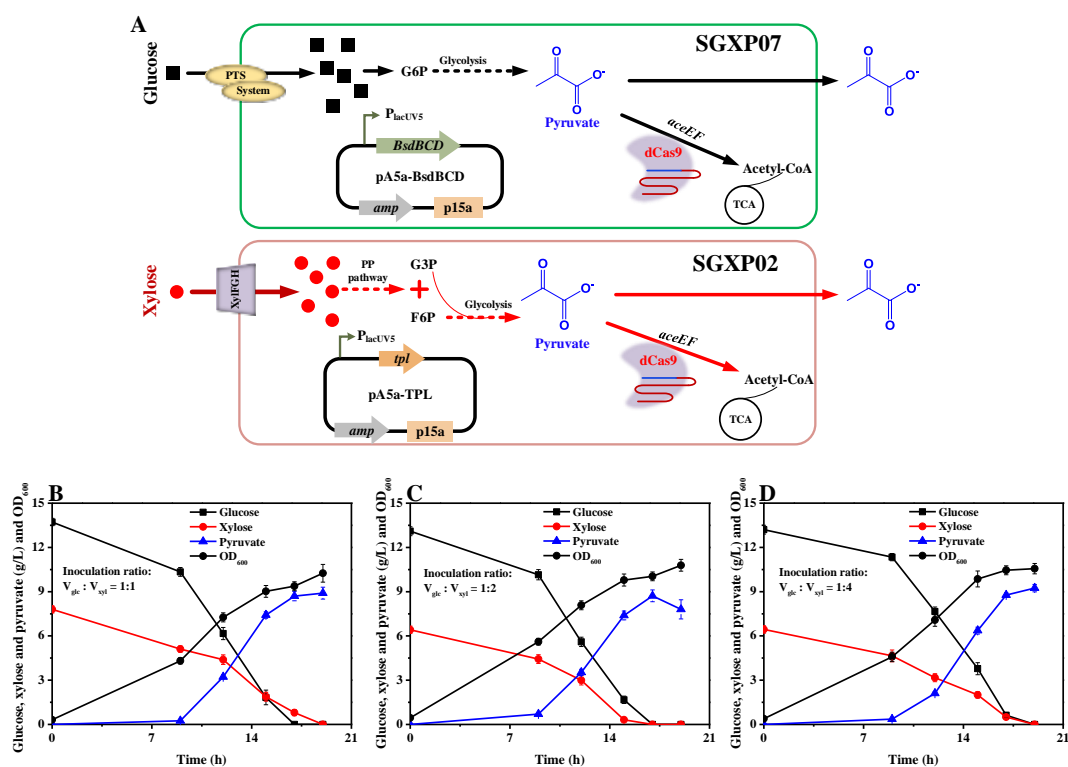

**Fig. S10** Optimization of pyruvate synthesis using the SGXP07-SGXP02 consortium with different inoculation ratios and 20 g L<sup>-1</sup> glucose-xylose mixtures (13.5 g L<sup>-1</sup> glucose and 6.5 g L<sup>-1</sup> xylose). A) Construction of SGXP07-SGXP02 consortium for pyruvate synthesis. The fermentations were started using an inoculation ratio of 1:1 (SGXP07:SGXP02) (B), 1:2 (SGXP07:SGXP02) (C) and 1:4 (SGXP07:SGXP02) (D). When cell cultures reached an  $OD_{600}$  of 1.2, 0.35 mg L<sup>-1</sup> aTc was added for dCas9 expression.

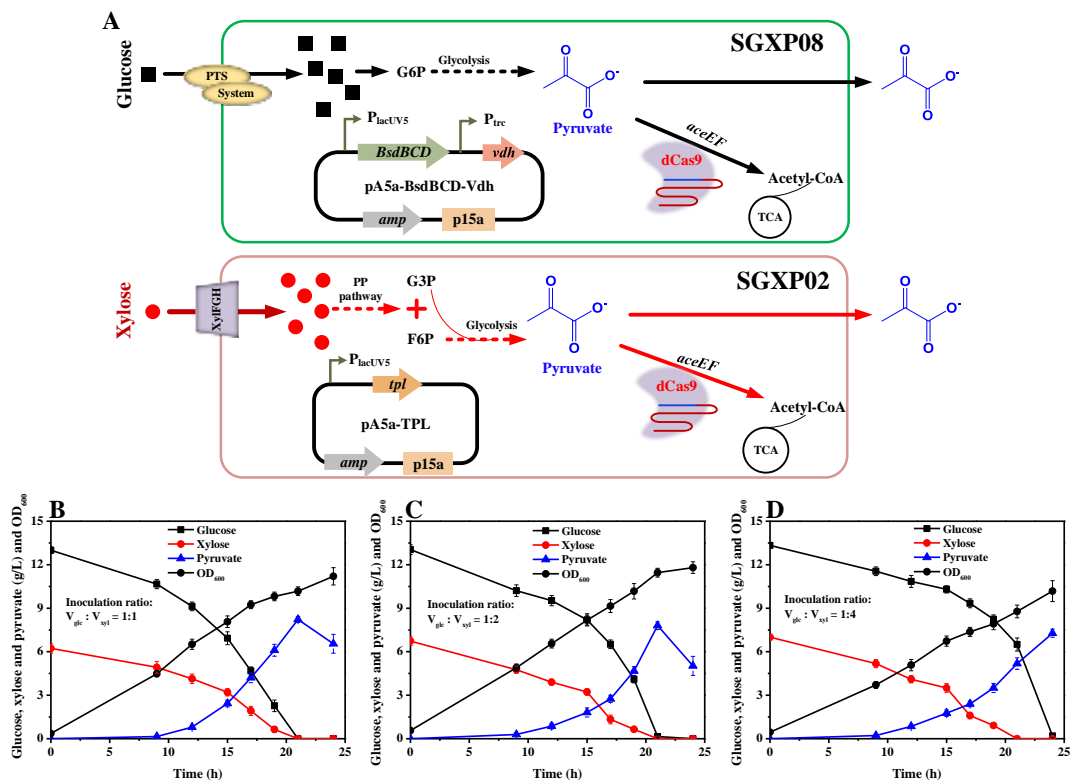

**Fig. S11** Optimization of pyruvate synthesis using the SGXP08-SGXP02 consortium with different inoculation ratios and 20 g L<sup>-1</sup> glucose-xylose mixtures (13.5 g L<sup>-1</sup> glucose and 6.5 g L<sup>-1</sup> xylose). A) Construction of SGXP08-SGXP02 consortium for pyruvate synthesis. The fermentations were started using an inoculation ratio of 1:2 (SGXP08:SGXP02) (B), 1:2 (SGXP08:SGXP02) (C) and 1:4 (SGXP08:SGXP02) (D). When cell cultures reached an OD<sub>600</sub> of 1.2, 0.35 mg L<sup>-1</sup> aTc was added for dCas9 expression.

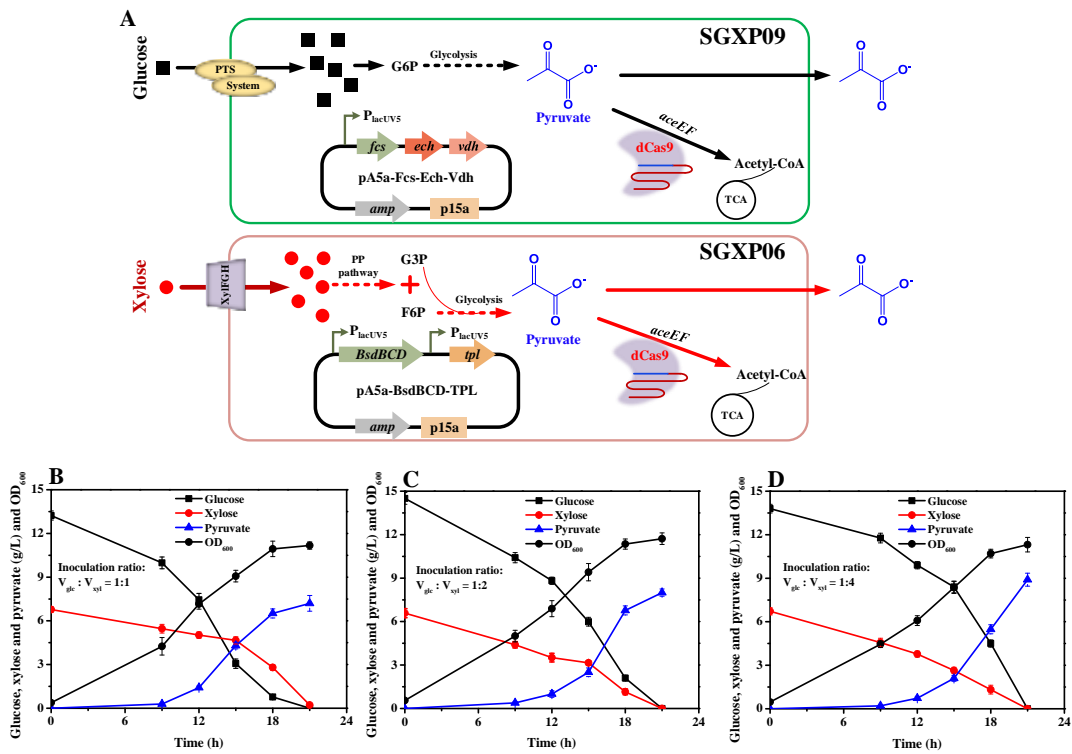

**Fig. S12** Optimization of pyruvate synthesis using the SGXP09-SGXP06 consortium with different inoculation ratios and 20 g L<sup>-1</sup> glucose-xylose mixtures (13.5 g L<sup>-1</sup> glucose and 6.5 g L<sup>-1</sup> xylose). A) Construction of SGXP09-SGXP06 consortium for pyruvate synthesis. The fermentations were started using an inoculation ratio of 1:2 (SGXP09:SGXP06) (B), 1:2 (SGXP09:SGXP06) (C) and 1:4 (SGXP09:SGXP06) (D). When cell cultures reached an OD<sub>600</sub> of 1.2, 0.35 mg L<sup>-1</sup> aTc was added for dCas9 expression.

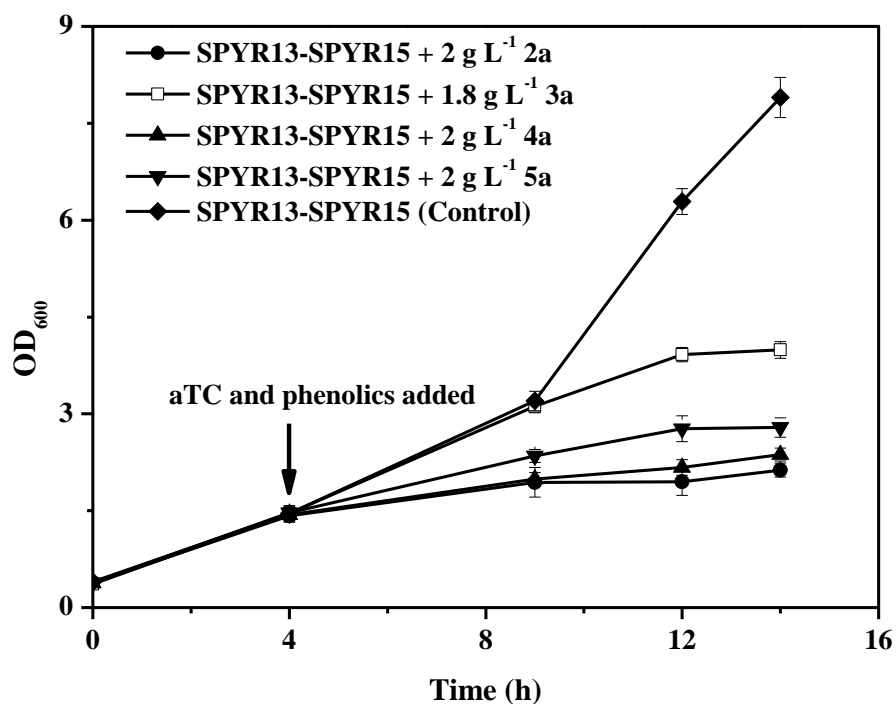

**Fig. S13** The effects of the different phenolics on the growth of SPYR13-SPYR15 consortium. The fermentations were started using 13.5 g L<sup>-1</sup> glucose and 6.5 g L<sup>-1</sup> xylose with an inoculation ratio of 1:4 (SPYR13:SPYR15). When cell cultures reached an OD<sub>600</sub> of 1.2, 0.35 mg L<sup>-1</sup> aTc was added for dCas9 expression, and different concentrations of phenolics (2 g L<sup>-1</sup> **2a**, 1.8 g L<sup>-1</sup> **3a**, 2 g L<sup>-1</sup> **4a** and 2 g L<sup>-1</sup> **5a**) were added to test the growth of SPYR13-SPYR15 consortium.

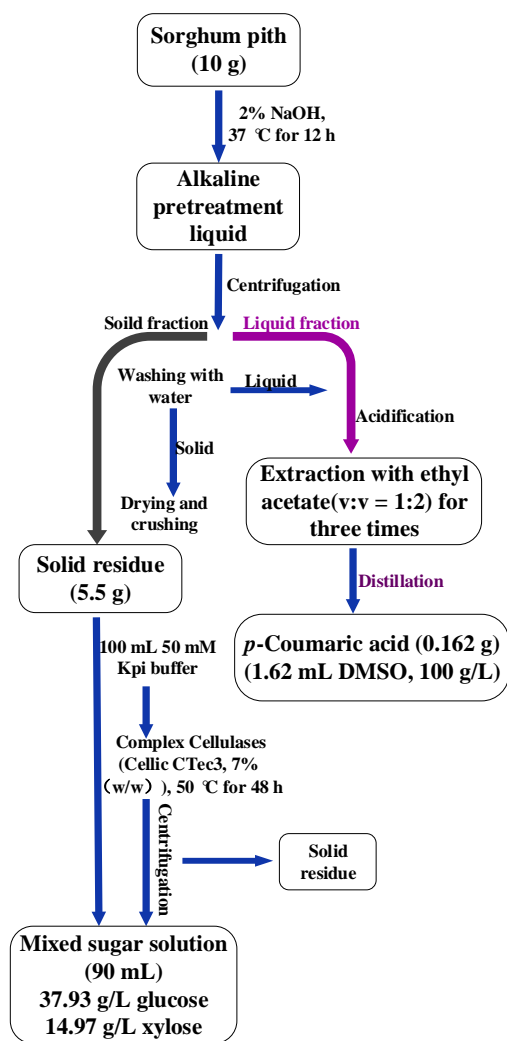

**Fig. S14** The entire enzymatic-chemical process to obtain the glucose-xylose mixtures and *p*-coumaric acid (**5a**) from sorghum pith.



**Table S1.** Plasmids used in this study

| Plasmids                | Descriptions                                                                                            | Sources               |
|-------------------------|---------------------------------------------------------------------------------------------------------|-----------------------|
| pS2k                    | Tet promoter, pSC101 ori, Kan <sup>R</sup>                                                              | BglBrick <sup>1</sup> |
| pA5a                    | LacUV5 promoter, p15A ori, Amp <sup>R</sup>                                                             | BglBrick <sup>1</sup> |
| pB1c                    | Trc promoter, pBBR1 ori, Cm <sup>R</sup>                                                                | BglBrick <sup>1</sup> |
| pCas                    | <i>repA101</i> (Ts) <i>kan</i> <i>Pcas-cas9</i> <i>ParaB-Red</i> <i>lacIq</i><br><i>Ptrc-sgRNA-pMB1</i> | <sup>2</sup>          |
| pTargetF                | P <sub>J23119</sub> , pMB1 ori, Sm <sup>R</sup>                                                         | <sup>2</sup>          |
| pS2k-dcas9              | pS2k carrying <i>dcas9</i>                                                                              | This study            |
| pTargetF- <i>aceE01</i> | N20-1, P <sub>J23119</sub> -sgRNA- <i>aceE1</i> , pMB1 ori, Sm <sup>R</sup>                             | This study            |
| pTargetF- <i>aceE02</i> | N20-2, P <sub>J23119</sub> -sgRNA- <i>aceE2</i> , pMB1 ori, Sm <sup>R</sup>                             | This study            |
| pTargetF- <i>aceE03</i> | N20-3, P <sub>J23119</sub> -sgRNA- <i>aceE3</i> , pMB1 ori, Sm <sup>R</sup>                             | This study            |
| pTargetF- <i>aceE04</i> | N20-4, P <sub>J23119</sub> -sgRNA- <i>aceE4</i> , pMB1 ori, Sm <sup>R</sup>                             | This study            |
| pTargetF- <i>aceE05</i> | N20-5, P <sub>J23119</sub> -sgRNA- <i>aceE5</i> , pMB1 ori, Sm <sup>R</sup>                             | This study            |
| pTargetF- <i>aceE06</i> | N20-6, P <sub>J23119</sub> -sgRNA- <i>aceE6</i> , pMB1 ori, Sm <sup>R</sup>                             | This study            |
| pTargetF- <i>aceE07</i> | N20-7, P <sub>J23119</sub> -sgRNA- <i>aceE7</i> , pMB1 ori, Sm <sup>R</sup>                             | This study            |
| pTargetF- <i>aceE08</i> | N20-8, P <sub>J23119</sub> -sgRNA- <i>aceE8</i> , pMB1 ori, Sm <sup>R</sup>                             | This study            |
| pTargetF- <i>aceE09</i> | N20-9, P <sub>J23119</sub> -sgRNA- <i>aceE9</i> , pMB1 ori, Sm <sup>R</sup>                             | This study            |
| pTargetF- <i>aceE10</i> | N20-10, P <sub>J23119</sub> -sgRNA- <i>aceE10</i> , pMB1 ori, Sm <sup>R</sup>                           | This study            |
| pTargetF- <i>aceE11</i> | N20-11, P <sub>J23119</sub> -sgRNA- <i>aceE11</i> , pMB1 ori, Sm <sup>R</sup>                           | This study            |
| pTargetF- <i>aceE12</i> | N20-12, P <sub>J23119</sub> -sgRNA- <i>aceE12</i> , pMB1 ori, Sm <sup>R</sup>                           | This study            |
| pTargetF- <i>aceE13</i> | N20-13, P <sub>J23119</sub> -sgRNA- <i>aceE13</i> , pMB1 ori, Sm <sup>R</sup>                           | This study            |
| pTargetF- <i>aceE14</i> | N20-14, P <sub>J23119</sub> -sgRNA- <i>aceE14</i> , pMB1 ori, Sm <sup>R</sup>                           | This study            |
| pTargetT- <i>ldhA</i>   | P <sub>J23119</sub> -sgRNA- <i>ldhA</i> , pMB1 ori, Sm <sup>R</sup> , donor DNAs                        | This study            |
| pTargetT- <i>poxB</i>   | P <sub>J23119</sub> -sgRNA- <i>poxB</i> , pMB1 ori, Sm <sup>R</sup> , donor DNAs                        | This study            |
| pTargetT- <i>pflB</i>   | P <sub>J23119</sub> -sgRNA- <i>pflB</i> , pMB1 ori, Sm <sup>R</sup> , donor DNAs                        | This study            |
| pA5a-TPL                | pA5a carrying <i>tpl</i>                                                                                | This study            |
| pA5a-TPL(M379V)         | pA5a carrying <i>tpl</i> (M379V)                                                                        | This study            |
| pA5a-BsdBCD             | pA5a carrying <i>BsdBCD</i>                                                                             | This study            |
| pA5a-BsdBCD-Vdh         | pA5a carrying <i>BsdBCD</i> and <i>vdh</i>                                                              | This study            |
| pA5a-BsdBCD-TPL         | pA5a carrying <i>BsdBCD</i> and <i>tpl</i>                                                              | This study            |
| pA5a-BsdBCD-TPL(M379V)  | pA5a carrying <i>BsdBCD</i> and <i>tpl</i> (M379V)                                                      | This study            |
| pA5a-Fcs-Ech-Vdh        | pA5a carrying <i>fcs</i> , <i>ech</i> and <i>vdh</i>                                                    | This study            |
| pA5a-KpdBCD             | pA5a carrying <i>KpdBCD</i>                                                                             | This study            |
| pA5a-AroY               | pA5a carrying <i>aroY</i>                                                                               | This study            |

**Table S2.** Strains used in this study

| Strains                     | Descriptions                                                                                                                                                                                                                                                     | Sources    |
|-----------------------------|------------------------------------------------------------------------------------------------------------------------------------------------------------------------------------------------------------------------------------------------------------------|------------|
| <i>E. coli</i> DH5 $\alpha$ | $F^-$ , $\phi 80d$ <i>lacZ</i> $\Delta$ M15, $\Delta$ ( <i>lacZYA-argF</i> ) U169, <i>recA1</i> , <i>endA1</i> ,<br><i>hsdR17</i> ( <i>rk</i> $^-$ , <i>mk</i> $^+$ ), <i>phoA</i> , <i>supE44</i> $\lambda^-$ , <i>thi</i> $^-1$ , <i>gyrA96</i> , <i>relA1</i> |            |
| <i>E. coli</i> MG1655       | K-12; $F^-$ $\lambda$ <i>rph-1</i>                                                                                                                                                                                                                               |            |
| MG40B                       | <i>E. coli</i> MG1655, $\Delta$ <i>ldhA</i> , $\Delta$ <i>poxB</i> , $\Delta$ <i>pflB</i>                                                                                                                                                                        | This study |
| MG74A3                      | MG40B, $\Delta$ <i>ptsG</i> , $\Delta$ <i>manZ</i> , $\Delta$ <i>galP</i> , $\Delta$ <i>glk</i>                                                                                                                                                                  | This study |
| SPYR01                      | MG40B carrying pS2k-dcas9 and pTargetF- <i>aceE</i> 01                                                                                                                                                                                                           | This study |
| SPYR02                      | MG40B carrying pS2k-dcas9 and pTargetF- <i>aceE</i> 02                                                                                                                                                                                                           | This study |
| SPYR03                      | MG40B carrying pS2k-dcas9 and pTargetF- <i>aceE</i> 03                                                                                                                                                                                                           | This study |
| SPYR04                      | MG40B carrying pS2k-dcas9 and pTargetF- <i>aceE</i> 04                                                                                                                                                                                                           | This study |
| SPYR05                      | MG40B carrying pS2k-dcas9 and pTargetF- <i>aceE</i> 05                                                                                                                                                                                                           | This study |
| SPYR06                      | MG40B carrying pS2k-dcas9 and pTargetF- <i>aceE</i> 06                                                                                                                                                                                                           | This study |
| SPYRP7                      | MG40B carrying pS2k-dcas9 and pTargetF- <i>aceE</i> 07                                                                                                                                                                                                           | This study |
| SPYR08                      | MG40B carrying pS2k-dcas9 and pTargetF- <i>aceE</i> 08                                                                                                                                                                                                           | This study |
| SPYR09                      | MG40B carrying pS2k-dcas9 and pTargetF- <i>aceE</i> 09                                                                                                                                                                                                           | This study |
| SPYR10                      | MG40B carrying pS2k-dcas9 and pTargetF- <i>aceE</i> 10                                                                                                                                                                                                           | This study |
| SPYR11                      | MG40B carrying pS2k-dcas9 and pTargetF- <i>aceE</i> 11                                                                                                                                                                                                           | This study |
| SPYR12                      | MG40B carrying pS2k-dcas9 and pTargetF- <i>aceE</i> 12                                                                                                                                                                                                           | This study |
| SPYR13                      | MG40B carrying pS2k-dcas9 and pTargetF- <i>aceE</i> 13                                                                                                                                                                                                           | This study |
| SPYR14                      | MG40B carrying pS2k-dcas9 and pTargetF- <i>aceE</i> 14                                                                                                                                                                                                           | This study |
| SPYR15                      | MG74A3 carrying pS2k-dcas9 and pTargetF- <i>aceE</i> 13                                                                                                                                                                                                          | This study |
| SGXP01                      | SPYR13 carrying pA5a-TPL                                                                                                                                                                                                                                         | This study |
| SGXP02                      | SPYR15 carrying pA5a-TPL                                                                                                                                                                                                                                         | This study |
| SGXP03                      | SPYR13 carrying pA5a-TPL(M379V)                                                                                                                                                                                                                                  | This study |
| SGXP04                      | SPYR15 carrying pA5a-TPL(M379V)                                                                                                                                                                                                                                  | This study |
| SGXP05                      | SPYR13 carrying pA5a-BsdBCD-TPL                                                                                                                                                                                                                                  | This study |
| SGXP06                      | SPYR15 carrying pA5a-BsdBCD-TPL                                                                                                                                                                                                                                  | This study |
| SGXP07                      | SPYR13 carrying pA5a-BsdBCD                                                                                                                                                                                                                                      | This study |
| SGXP08                      | SPYR13 carrying pA5a-BsdBCD-Vdh                                                                                                                                                                                                                                  | This study |
| SGXP09                      | SPYR13 carrying pA5a-Fcs-Ech-Vdh                                                                                                                                                                                                                                 | This study |
| SGXP10                      | SPYR15 carrying pA5a-BsdBCD-TPL(M379V)                                                                                                                                                                                                                           | This study |

**Table S3.** N20 sequences (targeting sites) used for targeting *aceE*

| N20 | Sequences (5'-3')    | PAM (NGG) |
|-----|----------------------|-----------|
| 1   | CGAAGCGCGTACTTTCGGTA | TGG       |
| 2   | GGATGACCGATTCGATCGCC | TGG       |
| 3   | CTTTCCGGCGAGAGTTCAAT | GGG       |
| 4   | TCAACGTTATTAGATAGATA | AGG       |
| 5   | TGCGGGCTTCAGCAAGCAGT | TGG       |
| 6   | GTTGCTGATACCTGTGCCTG | CGG       |
| 7   | AGCGGATAGCTGAACGAATA | CGG       |
| 8   | AATGGTTGCGGAAGACTGGA | AGG       |
| 9   | GGCGACCTGGTTTACTTCCA | GGG       |
| 10  | CCAGACCCATAGATACGGTC | GGG       |
| 11  | CCGGGCCGTCAAGACGCTGC | AGG       |
| 12  | TCGATATCTGCATCAGACAC | CGG       |
| 13  | TCTTCGGATCGTGACCACCA | CGG       |
| 14  | GCGCCGAAGTCTTGCAGGCT | CGG       |

**Table S4.** Conversions (%) for the formation of tyrosine derivatives employing wild-type TPL from *Citrobacter freundii*.

| Substrate                      | Conversion (%) |
|--------------------------------|----------------|
| Guaiacol ( <b>2c</b> )         | n.c.           |
| <i>o</i> -Cresol ( <b>2d</b> ) | n.c.           |
| <i>m</i> -cresol ( <b>2e</b> ) | 45             |

Reaction conditions: 1 g L<sup>-1</sup> phenol derivatives, 20 g L<sup>-1</sup> NH<sub>4</sub>Cl, 10 g L<sup>-1</sup> pyruvate, and 0.5 mM PLP. n.c.=no conversion.

The biocatalyst was constructed by transforming pA5a-TPL into strain MG40B. The reactions were performed in 10 mL KPi

buffer with an OD<sub>600</sub> of 15 at 37 °C and 220 rpm for 6 h.

**Table S5.** Chemicals used in this study

| Chemicals                                    | Sources                        |
|----------------------------------------------|--------------------------------|
| Catechol ( <b>2b</b> )                       | Macklin                        |
| <i>o</i> -Cresol ( <b>2d</b> )               | Macklin                        |
| Vanillin ( <b>4c</b> )                       | Macklin                        |
| Ferulic acid ( <b>5c</b> )                   | Macklin                        |
| <i>m</i> -Cresol ( <b>2e</b> )               | Aladdin                        |
| Caffeic acid ( <b>5b</b> )                   | Aladdin                        |
| Protocatechuic acid ( <b>3b</b> )            | Shanghai yuanye Bio-Technology |
| Vanillic acid ( <b>3c</b> )                  | Shanghai yuanye Bio-Technology |
| Protocatechualdehyde ( <b>4b</b> )           | Shanghai yuanye Bio-Technology |
| L-DOPA ( <b>1b</b> )                         | Adamas                         |
| <i>p</i> -Coumaric acid ( <b>5a</b> )        | Adamas                         |
| <i>p</i> -Hydroxybenzoic acid ( <b>3a</b> )  | Shanghai Dibai                 |
| <i>p</i> -Hydroxybenzaldehyde ( <b>4a</b> )  | J&K Scientific                 |
| Phenol ( <b>2a</b> )                         | Shanghai Titan Scientific      |
| Guaiacol ( <b>2c</b> )                       | RHAWN                          |
| L-Tyrosine ( <b>1a</b> )                     | Sangon Biotech                 |
| 3-OCH <sub>3</sub> -L-tyrosine ( <b>1c</b> ) | Amatek Chemical                |
| 3-CH <sub>3</sub> -L-tyrosine ( <b>1d</b> )  | Asta Tech                      |

**Table S6.** DNA sequences used in this study

| Gene name  | DNA sequences                                                                                                                                                                                                                                                                                                                                                                                                                                                                                                                                                                                                                                                                                                                                                                                                                                                                                                                                                                                                                                                                                                                                                                                                                                                                                                                                                                                                                                                                                                                                                                                                                                                                                                                                                                                                                                                                                                                                                                                                                                                                                        |
|------------|------------------------------------------------------------------------------------------------------------------------------------------------------------------------------------------------------------------------------------------------------------------------------------------------------------------------------------------------------------------------------------------------------------------------------------------------------------------------------------------------------------------------------------------------------------------------------------------------------------------------------------------------------------------------------------------------------------------------------------------------------------------------------------------------------------------------------------------------------------------------------------------------------------------------------------------------------------------------------------------------------------------------------------------------------------------------------------------------------------------------------------------------------------------------------------------------------------------------------------------------------------------------------------------------------------------------------------------------------------------------------------------------------------------------------------------------------------------------------------------------------------------------------------------------------------------------------------------------------------------------------------------------------------------------------------------------------------------------------------------------------------------------------------------------------------------------------------------------------------------------------------------------------------------------------------------------------------------------------------------------------------------------------------------------------------------------------------------------------|
| <i>fes</i> | ATGAATAACGAAGCCCGCTCAGGGTCGACCGACCCTGGCCAACGTCCGCGCTA<br>CCGCCAGGTGGCCATCGGGCATCCCCAGGTGCAGGTACGTCACGTCGACGACG<br>TGCTGCGCATGCAACCTGTCGAGCCACTGGCGCCGCTGCCGGCGCGCCTGCTC<br>GAGCGCCTGGTGCATTGGGCCCAGGTGCGCCCGGACACCACTTTCATCGCGGC<br>ACGCCAGGCAGACGGTGCCTGGCGTTCGATCAGCTACGTGCAGATGCTCGCCG<br>ATGTGCGCACCATCGCCGCCAATTGCTAGGACTGGGCCTCAGTGCCGAGCGC<br>CCGCTGGCGCTGCTTCCGGCAACGACATCGAACACCTGCAAATCGCCCTCGG<br>CGCCATGTATGCCGGTATTGCCTATTGCCCGGTGTCGCCGGCCTACGCGCTGTTG<br>TCGCAAGACTTCGCCAAGTTGCGCCATGTCTGCGAGGTGCTACCCCCGGAGT<br>GGTCTTCGTCAGCGACAGCCAGCCGTTCCAGCGCGCCTTCGAGGCGGTGCTGG<br>ACGATTCCGGTCGGCGTGATCAGCGTGCCTGGCCAGGTGCGAGGTGCCCCCAT<br>ATAAGCTTCGACAGCCTGTTGCAACCGGGTGACCTGGCGGCGGCCGATGCGGC<br>TTTCGCCGCCACCGGGCCGGACACCATCGCCAAATTCCTCTTCACCTCGGGCTC<br>GACCAAGCTGCCAAGGCGGTGATCACCACCAGCGCATGCTGTGCGCCAATC<br>AGCAGATGCTTCTGCAGACTTTTCCGACGTTCCGCCGAGGAGCCGCCGGTGCTG<br>GTGGACTGGCTGCCGTGGAACCACACGTTCCGGCGGTAGCCACAACCTCGGCAT<br>CGTGCTTTACAACGGGGGCAGTTTCTACCTGGACGCCGGCAAGCCGACCCCGC<br>AAGGCTTCGCCGAAACCTTGCGCAATCTGCGCGAGATTTCCCCACGGCCTAC<br>CTCACCGTACCCAAGGGCTGGGAGGAACTGGTCAAGGCACTGGAGCAGGACC<br>CCGCGCTACGCGAGGTGTTCTTTGCCCGCATCAAGCTGTTCTTCTTTGCCGCCG<br>CAGGCCTGTCGCAAAGCGTCTGGGACCGGTGGACCGCATTGCCGAGCAACA<br>CTGTGGCGAACGCATCCGCATGATGGCCGGCCTTGGCATGACCGAAGCCTCGC<br>CATCGTGACCTTCACCACCGGGCCTTTGTGATGGCCGGCTATGTCGGGCTGC<br>CGGCACCTGGCTGCGAAGTGAAGCTGGTGCCGGTGGGCGACAAGCTCGAGGC<br>GCGCTTCCGTGGCCCGCATATCATGCCGGGCTACTGGCGCTCGCCGCAGCAGAC<br>CGCCGAGGCGTTTCGACGAGGAGGGCTTCTACTGTTCCGGGCGACGCGTTGAAGC<br>TGGCCGATGCCAGGCAGCCCGAGCTTGGCCTGATGTTTCGATGGCCGTATCGCTG<br>AGGACTTCAAACCTTCGTCCGGGGTATTTCGTCAGTGTCCGGCCGCTGCGCAAC<br>CGCGCAGTGCTGGAGGGCTCGCCTTACGTACAGGACATCGTGGTCACCGCGCC<br>GGACCGTGAATGCCTGGGCCTGCTGGTGTTCGCCGCTGCCCCGAGTGTCCGGC<br>GCCTGGCCGGGCTGGCAGAGGATGCCAGCGATGCGCGGGTGTGGCCAACGA<br>CACCGTGCGCAGTTGGTTCGCTGACTGGCTGGAGCGCTTGAACCGCGATGCC<br>AAGGCAACGCCAGCCGTATCGAATGGCTGTCGCTGCTGGCCGAGCCGCCGTGC<br>ATCGACGCCGGTCAAATCACCAGCAAGGGCTCGATCAATCAGCGCGCCGTGCT<br>GCAGCGGCGCGCCGCTCAGGTGCGAGGCGCTGTACCGTGGCGAAGACCCCGAC<br>GCATTGCACGCCAAGGTGCGGCCTTGA |
| <i>ech</i> | ATGAGCAAATACGAAGGCCGCTGGACCACCGTGAAGGTGCAACTGGAAGCGG<br>GCATCGCCTGGGTGACCCTCAATCGCCCGGAAAACGCAATGCCATGAGCCCC<br>ACCCTGAACCGGAAATGGTCGACGTGCTGGAAACCTTGAGCAGGACGCTG<br>ACGCTGGCGTGCTGGTATTGACCGGTGCCGGCGAGTCTTGACCGCCGGCATG<br>GACCTGAAGGAGTACTTCCGCGAGGTGGACGCCGGCCCGGAAATCCTCCAGG                                                                                                                                                                                                                                                                                                                                                                                                                                                                                                                                                                                                                                                                                                                                                                                                                                                                                                                                                                                                                                                                                                                                                                                                                                                                                                                                                                                                                                                                                                                                                                                                                                                                                                                                                                                                                   |

|             |                                                                                                                                                                                                                                                                                                                                                                                                                                                                                                                                                                                                                                                                                                                                                                                                                                                                                                                                                                                                                                                                                                                                                                                                                                                                                                                                                                                                                                                                                                                                                                                                                            |
|-------------|----------------------------------------------------------------------------------------------------------------------------------------------------------------------------------------------------------------------------------------------------------------------------------------------------------------------------------------------------------------------------------------------------------------------------------------------------------------------------------------------------------------------------------------------------------------------------------------------------------------------------------------------------------------------------------------------------------------------------------------------------------------------------------------------------------------------------------------------------------------------------------------------------------------------------------------------------------------------------------------------------------------------------------------------------------------------------------------------------------------------------------------------------------------------------------------------------------------------------------------------------------------------------------------------------------------------------------------------------------------------------------------------------------------------------------------------------------------------------------------------------------------------------------------------------------------------------------------------------------------------------|
|             | AAAAGATTTCGTCGCGAAGCCTCGCAATGGCAATGGAAGTTGCTGCGTCTGTAT<br>GCCAAACCGACCATCGCCATGGTCAACGGCTGGTGCTTCGGCGGCGGCTTCAG<br>CCCCTGGTGGCATGCGACCTGGCGATCTGCGCCAACGAAGCGACCTTCGGCC<br>TGTCGGAAATCAACTGGGGCATCCCGCCTGGTAACCTGGTCAGCAAGGCCATG<br>GCCGATAACCGTTGGCCATCGTCAGTCGCTGTACTACATCATGACCGGCAAGACC<br>TTCGATGGTCGCAAGGCTGCCGAGATGGGCCTGGTGAACGACAGTGTGCCGCT<br>GGCCGAGCTGCGTGAAACCACCCGCGAGTTGGCGCTGAACCTGCTGGAAAAG<br>AACCCGGTGGTGCTGCGTGCCGCGAAGAATGGCTTCAAGCGTTGCCGCGAGCT<br>GACCTGGGAACAGAACGAGGACTACCTCTACGCCAAGCTCGACCAGTCGCGC<br>CTGCTGGACACTACCGGCGGCCGCGAGCAGGGCATGAAGCAGTTCCTCGACGA<br>CAAGAGCATCAAGCCAGGCCTGCAGGCCTACAAGCGCTGA                                                                                                                                                                                                                                                                                                                                                                                                                                                                                                                                                                                                                                                                                                                                                                                                                                                                                                                                                                                         |
| <i>vdh</i>  | ATGTTGCAGGTGCCTTTGCTGATTGGCGGGCAGTCGCGCCCCGCCAGCGATGG<br>ACGAACCTTCGAGCGCTGTAACCCGGTGAAGTGGCGAGGTGGTGTGCGAGGCTG<br>CCGCCGCCACACTGGCCGATGCCGATGCCGCGGTGGCTGCTGCCAGCGCGGCG<br>TTTCCGGCCTGGGCCGCCCTGGCACCCGGGCGAGCGGCGCAGCCGCTTGCTGGC<br>AGGCGCTGATCTGTTGCAGGCGAGGGCCGCCGAGTTCATCGCCGCCGCCGGTG<br>AAACCGGGGGCCATGGCCAACTGGTATGGCTTCAACGTGAAGTTGGCCGCCAAC<br>ATGCTGCGCGAGGCTGCAGCCATGACCACGCAGATCACCGGTGAAGTGATCCC<br>CTCGGACGTTCCCGGCAGCTTCGCAATGGCCCTGCGCGCGCCCTGCGGCGTGG<br>TGTTGGGCATCGCACCGTGGAACGCCCCGGTGATACTGGCCACGCGTGCCATT<br>GCCATGCCGCTGGCCTGCGGCAACACCGTGGTGTCAAGGCCTCGGAGCTGAG<br>CCCGGCGGTCCATCGGCTGATCGGCCAGGTGCTGCACGATGCAGGCATCGGCG<br>ACGGCGTGGTCAATGTCATCAGCAATGCGCCGCAGGATGCCCCCGCCATCGTC<br>GAGCGGTGATCGCCAACCCTGCGGTACGCCGGGTCAACTTCACCGGTTGAC<br>GCACGTCGGGCGCATCGTCGGCGAACTGGCGGCCCGCCATCTCAAGCCGGCCC<br>TGCTCGAACTGGGCGGCAAGGCACCTTTGCTGGTGTGCTCGACGATGCCGACCTG<br>GACGCCACGGTTCGAAGCGGCGGCCTTCGGTGCCTACTTCAACCAGGGGCAGAT<br>CTGCATGTCCACCGAGCGCCTTGTGGTGGACAGCTGTATTGCCGACGCTTTCGT<br>CGACAAGCTGGCGGTGAAGATCGCCGGGCTGCGTGCAGGTGATCCGCAAGCC<br>AGCACCTCGGTGCTCGGCTCGCTGGTCAGCGCAGCGGCCGGCGAGCGCATCAA<br>GGCACTGATCGACGATGCCGTGGCCAAGGGCGCGCGCCTGGTCAGCGGCGGC<br>CAGCTGGAAGGCAGCATCCTGCAACCGACCTTGCTCGACAACGTCGATGCCAG<br>CATGCGCCTGTACCGCGAGGAGTCCCTTCGGCCCCGGTGGCGGTGGTACTGCGCG<br>CCGAAGGCGACGAAGCCTTGCTGCAGCTGGCCAACGACTCGGAGTTCGGTCTG<br>TCATCGGCCATTTTCAGCCGCGACACCAGCCGCGCCCTGGCCTTGGCCAACG<br>GGTGGAGTCGGGTATCTGCCATATCAACGGCCCCGACCGTTCACGATGAAGCGC<br>AGATGCCGTTTGGCGGGGTCAAGTCCAGCGGCTATGGCAGCTTCGGCAGCCGC<br>ACGGCCATCGATCAGTTCACCCAGTTGCGCTGGGTCACCCTCCAGCACGGCCC<br>GCGTCACTATCCCATCTAG |
| <i>aroY</i> | ATGCAAACCCCATCAACGATCTCAGAAGCGCCATCGCGTTGCTGCAACGCCA<br>TCCAGGTCACTATATCGAAACCGATCACCCGGTAGATCCCAATGCTGAACTGGC<br>GGGCGTCTACCGCCATATCGGCGCGGGCGGTACCGTAAAACGCCCCACCCGCA<br>CGGGCCCCGGCCATGATGTTCAATAGCGTGAAGGGCTACCCTGGCTCCCGCATCC<br>TGGTAGGTATGCACGCCAGCCGGGAAAGAGCGGCGCTTCTGCTGGGCTGTGTA                                                                                                                                                                                                                                                                                                                                                                                                                                                                                                                                                                                                                                                                                                                                                                                                                                                                                                                                                                                                                                                                                                                                                                                                                                                                                                                                |

|             |                                                                                                                                                                                                                                                                                                                                                                                                                                                                                                                                                                                                                                                                                                                                                                                                                                                                                                                                                                                                                                                                                                                                                                                                                                                                                                                                                                                                                        |
|-------------|------------------------------------------------------------------------------------------------------------------------------------------------------------------------------------------------------------------------------------------------------------------------------------------------------------------------------------------------------------------------------------------------------------------------------------------------------------------------------------------------------------------------------------------------------------------------------------------------------------------------------------------------------------------------------------------------------------------------------------------------------------------------------------------------------------------------------------------------------------------------------------------------------------------------------------------------------------------------------------------------------------------------------------------------------------------------------------------------------------------------------------------------------------------------------------------------------------------------------------------------------------------------------------------------------------------------------------------------------------------------------------------------------------------------|
|             | <p>CCCTCGAAGCTGGCACAGCACGTTGGTCAGGCGGTGAAAAACCCGGTTGCAC<br/> CGGTGGTGGTTCCGGCCTCGCAGGCACCGTGCCAGGAGCAGGTCTTTTACGCC<br/> GACGATCCGGACTTTGACCTGCGTAAGCTGCTTCCGGCCCCGACCAACACGCC<br/> GATTGATGCAGGCCGTTCTTCTGTCTGGGGCTGGTACTGGCAAGCGATCCGGA<br/> AGATACCTCGCTGACCGATGTGACCATTACCGTCTCTGTGTGCAGGAGCGAGA<br/> TGAACTCTCTATGTTTCCTTGCCGCCGGCCGCCATATCGAAGTCTTTCGCAAGAA<br/> GGCCGAAGCGGCGGGCAAACCGCTGCCGGTAACCATCAATATGGGACTTGACC<br/> CGGCTATCTACATTGGGGCCTGTTTCGAAGCGCCAACCACGCCATTCGGTTACA<br/> ACGAGCTTGGCGTTGCCGGGGCATTACGCCAGCAACCGGTGGAGCTGGTACAG<br/> GGCGTGGCGGTAAAAGAGAAAAGCGATCGCGCGGGCGGAAATCATCATCGAGG<br/> GCGAACTGCTTCCCGCGTGC GCGTAAGAGAAGATCAGCACACCAACACCGG<br/> CCACGCCATGCCGGAGTTCCCGGGCTACTGCGGCGAGGCGAATCCGTCTCTGC<br/> CGGTGATCAAAGTGAAAGCCGTGACGATGCGAAACCACGCGATCCTGCAGAC<br/> GCTGGTGGGCCCCGGGCGAAGAGCACACCACGCTTGCCGGTTTGCCGACCGAG<br/> GCCAGCATTGCAACGCGGTGCAAGAGGCCATTCCCGGCTTTCTGCAAAACGT<br/> TTACGCCCACACCGCCGGAGGCGGTAAATTCCTCGGCATTTTACAGGTGAAAA<br/> AACGCCAGCCGTCAGACGAAGGACGTCAGGGCCAGGCGGCACCTTATCGCCCT<br/> GGCCACCTATTCCGAGCTGAAAAACATTATCCTCGTGGATGAAGACGTGGATAT<br/> CTTCGACAGCGACGATATCCTGTGGGCAATGACCACCCGCATGCAGGGCGATGT<br/> GAGCATCACACGCTTCCGGGGATCCGCGGCCACCAGCTGGATCCGTTCGCAGT<br/> CACCGGACTACAGCACCTCGATCCGTGAAACGGCATTTCCTGCAAGACTATCT<br/> TCGACTGCACGGTGCCGTGGGCGCTGAAGGCGCGGTTTGAACGGGCGCCGTTT<br/> ATGGAGGTTGACCCACACCGTGGGCGCCGGAGCTGTTTCAGCGATAAAAAATA<br/> G</p> |
| <i>BsdB</i> | <p>ATGAAAGCAGAATTCAAGCGTAAAGGAGGGGGCAAAGTGAAACTCGTTGTGCG<br/> GAATGACAGGGGCAACAGGGGCCATTTTCGGGGTTCAGGCTGCTGCAGTGGCTG<br/> AAGGCCGCCGGAGTGAAACCCATCTCGTTGTGTCTCCTTGGGCAAACGTCAC<br/> GATCAAACACGAAACAGGCTATACGTTACAAGAAGTAGAACAACCTGGCCACAT<br/> ACACTTACTCACATAAGGATCAGGCGGCAGCCATTTCAAGCGGGTCGTTTGATA<br/> CCGATGGAATGATTGTTGCGCCGTGCAGCATGAAATCTCTCGCAAGCATTGCA<br/> CAGGAATGGCGGATAATCTGCTGACACGTGCGGCGGATGTCATGCTCAAGGAG<br/> AGAAAAAACTCGTCCTCTTAACGAGAGAGACGCCTTTGAACCAAATTCATCT<br/> CGAAAATATGCTAGCGCTTACGAAAATGGGCACCATCATTCTTCTCCGATGCC<br/> GGCATTTTATAATCGGCCGAGAAGCTTAGAGGAAATGGTTGACCATATTGTTTTT<br/> AGAACGTTGGACCAATTCGGCATTTCGGCTTCTGAAGCGAAGCGCTGGAATGG<br/> GATTGAAAAACAAAAAGGAGGAGCTTGA</p>                                                                                                                                                                                                                                                                                                                                                                                                                                                                                                                                                                                                                                                                                                        |
| <i>BsdC</i> | <p>ATGGCTTATCAAGATTTTCAGAGAATTTCTCGCTGCCCTTGAAAAAGAAGGACAG<br/> CTGCTTACAGTGAATGAAGAGGTAAAGCCGGAACCGGATTTAGGGGCCTCCGC<br/> ACGGGCAGCCAGCAATCTTGGCGATAAAAGCCCTGCGCTCTTATTTAACAACAT<br/> TTACGGCTATCATAACGCGCAATTGCGATGAATGTCATCGGCTCTTGGCCAAA<br/> CCATGCCATGATGCTGGGCATGCCGAAAGACACACCGGTAAAAGAACAGTTTTT<br/> TTGAATTCGCAAAGCGTTATGACCAGTTTCCGATGCCGGTCAAACGTGAGGAA<br/> ACAGCGCCATTTTCATGAAAATGAAATCACAGAAGATATCAATTTGTTTCGATATAC<br/> TGCTCTTTTTCAGAATTAACCAGGGTGTGGAGGCTACTATTTAGACAAAGCAT</p>                                                                                                                                                                                                                                                                                                                                                                                                                                                                                                                                                                                                                                                                                                                                                                                                                                                                                                                      |



|             |                                                                                                                                                                                                                                                                                                                                                                                                                                                                                                                                                                                                                                                                                                                                                                                                                                                                                                                                                                                                                                                                                                                                                        |
|-------------|--------------------------------------------------------------------------------------------------------------------------------------------------------------------------------------------------------------------------------------------------------------------------------------------------------------------------------------------------------------------------------------------------------------------------------------------------------------------------------------------------------------------------------------------------------------------------------------------------------------------------------------------------------------------------------------------------------------------------------------------------------------------------------------------------------------------------------------------------------------------------------------------------------------------------------------------------------------------------------------------------------------------------------------------------------------------------------------------------------------------------------------------------------|
|             | <p>GTGTCATTTCCCGTGATCTTGAGGACCTGACAACCTTCGGCAAACAAAATGTCCG<br/> GCATTTACAGAATGCAAGTCAAAGGAAAAGACCGCCTTGGCATTACAGCCTGTC<br/> CCGCAGCACGATATTGCAATCCATCTGCGCCAAGCTGAAGAACGCGGCATCAA<br/> CCTTCCGGTCACTATTGCGCTCGGCTGTGAGCCGGTCATTACAACGGCGGCATC<br/> GACTCCGCTTCTCTATGATCAATCAGAATACGAAATGGCAGGTGCGATTCAAGG<br/> CGAACCATATCGCATCGTCAAATCAAAGCTGTCTGATCTTGATGTTCCGTGGGG<br/> CGCTGAAGTGGTGCTTGAAGGTGAGATTATTGCCGGAGAGCGCGAATATGAAG<br/> GGCCGTTCCGGTGAATTCACAGGCCATTATTCCGGCGGACGCAGCATGCCGATTA<br/> TCAAAATTAACGCGTCTATCACAGAAACAATCCGATCTTTGAACATTTATACTT<br/> AGGCATGCCTTGGACAGAATGCGATTACATGATCGGCATTAACACATGCGTGCC<br/> GCTTTATCAGCAGTTAAAAGAAGCGTATCCGAACGAAATTGTGGCAGTGAACG<br/> CCATGTACACACACGGTTTAATCGCGATTGTTTCCACAAAAACCCGCTATGGCG<br/> GATTTGCGAAAGCGGTTCGGCATGCGCGCACTCACAAACGCCGCACGGACTCGGC<br/> TACTGCAAAATGGTCATAGTCGTTGATGAGGATGTCGATCCATTCAACCTTCCG<br/> CAGGTCATGTGGGCGCTTTTCGACCAAATGCATCCGAAACATGATGCGGTTCATC<br/> ATTCCGGACTTATCTGTCTGCGCTTGATCCGGGATCCAATCCATCAGGAATCA<br/> CTCACAAAATGATTCTCGACGCCACTACACCGGTTGCGCCGGAACAAGAGGC<br/> CATTATTCACAGCCGCTTGATTCTCCGCTAACAAACGAAAGAATGGGAACAAAA<br/> ACTAATGGACTTAATGAATAAATAA</p> |
| <i>BsdD</i> | <p>ATGCATACATGTCCTCGATGCGACTCAAAAAAGGGAGAAGTCATGAGCAAATC<br/> GCCTGTAGAAGGCGCATGGGAAGTTTATCAGTGCCAAACATGCTTTTTTACATG<br/> GAGATCCTGTGAACCGGAAAGCATTACAAATCCCGAAAAATACAATCCAGCGT<br/> TTAAATTTGATCCAAAGGAAACAGAAACAGCAATTGAAGTTCCGGCGGTGCCG<br/> GAACGAAAGGCTTGA</p>                                                                                                                                                                                                                                                                                                                                                                                                                                                                                                                                                                                                                                                                                                                                                                                                                                                                                    |
| <i>KpdB</i> | <p>ATGAAACTGATTATTGGGATGACGGGGGCCACCGGGGCACCGCTTGGGGTGGC<br/> ATTGCTGCAGGCGCTGCGCGATATGCCGGAGGTGGAAACCCATCTGGTGATGTC<br/> GAAATGGGCCAAAACCACCATCGAGCTGGAAACGCCCTGGACGGCGCGCGAA<br/> GTGGCCGCGCTGGCGGACTTTTCCACAGCCCGGCAGACCAGGCCGCCACCAT<br/> CTCATCCGGTTCATTTTCGTACCGACGGCATGATCGTTATCCCTGCAGTATGAAA<br/> ACGCTTGCAGGCATTCGCGCGGGTTATGCCGAAGGGCTGGTGGGCGCGCGGC<br/> GGACGTGGTGCTCAAAGAGGGGGCGCAAGCTGGTGTGGTCCCAGCGGAAATG<br/> CCGCTCAGCACGATCCATCTGGAGAACATGCTGGCGCTGTCCCGCATGGGCGT<br/> GGCGATGGTCCCAGCCATGCCAGCTTACTACAACCACCCGGAGACGGTTGACG<br/> ATATACCAATCATATCGTACCCGGGTGCTGGATCAGTTTGGCCTCGACTATCA<br/> CAAAGCGCGCCGCTGGAACGGCTTACGCACGGCAGAACAAATTTGCACAGGAG<br/> ATCGAATAA</p>                                                                                                                                                                                                                                                                                                                                                                                                                                                               |
| <i>KpdC</i> | <p>ATGGCTTTTGTGATGATTTGCGCAGCTTTTTGCAGGCGCTGGATGACCAGGGACAA<br/> CTGCTGAAAATCAGTGAAGAGGTGAACGCTGAGCCCGATCTGGCGGCGGCCGC<br/> CAATGCGACCGGACGCATCGGCGACGGTGCCCCGGCGCTGTGGTTCGATAATAT<br/> TCGCGGCTTTAACGACGCTCGCGTGACGATGAACACCATCGGCTCGTGCCAGA<br/> ACCATGCCATCTCGCTGGGCTGCGGCTAACACGCGGTTGAAAAAGCAGATT<br/> GATGAGTTCATTCGCCGCTGGGATAACTTCCCGGTGACGCCAGAGCGCCGCGC<br/> CAACCCGGCGTGGGCAGAAAATACTGTTGATGGCGATGATATCAACCTGTTCGA<br/> TATTCTGCCGCTGTTCCGCTCAATGATGGTGACGGCGGTTTCTACCTCGATAAA</p>                                                                                                                                                                                                                                                                                                                                                                                                                                                                                                                                                                                                                                                          |

|             |                                                                                                                                                                                                                                                                                                                                                                                                                                                                                                                                                                                                                                                                                                                                                                                                                                                                                                                                                                                                                                                                                                                                                                                                                                         |
|-------------|-----------------------------------------------------------------------------------------------------------------------------------------------------------------------------------------------------------------------------------------------------------------------------------------------------------------------------------------------------------------------------------------------------------------------------------------------------------------------------------------------------------------------------------------------------------------------------------------------------------------------------------------------------------------------------------------------------------------------------------------------------------------------------------------------------------------------------------------------------------------------------------------------------------------------------------------------------------------------------------------------------------------------------------------------------------------------------------------------------------------------------------------------------------------------------------------------------------------------------------------|
|             | <p>GCCTGTGTCGTTTCACGCGATCCGCTGGATAAAGATAA ACTTCGGTAAGCAAAC<br/> GTCGGTATCTACCGCATGGAAGTGAAAGGCAAGCGCAAGCTCGGCCTGCAGCC<br/> GGTACCGATGCACGATATCGCGCTGCATCTGCACAAAGCGGAAGAGCGTGGGG<br/> AAGATCTGCCGATCGCCATTACCCTCGGTAACGACCCGATTATTACCCTGATGGG<br/> CGCCACGCCGCTGAAATACGATCAGTCTGAATATGAGATGGCTGGCGCGCTGCG<br/> CGAGAGCCCCTATCCCATCGCTACCGCGCCGCTGACCGGCTTTGACGTGCCCTG<br/> GGTTTCGGAAGTGATCCTCGAAGGGGTCATTGAAGGGCGTAAGCGTGAGATCG<br/> AGGGGCCGTTTCGGTGAATTTACCGGTCACTACTCCGGCGGTCTGTAACATGACG<br/> GTAGTGCGTATCGACAAAGTCTTTATCGCAGCAAACCGATTTTTGAATCGCTCT<br/> ACCTCGGTATGCCGTGGACCGAGATTGACTATCTGATGGGCCCGGCGACCTGCG<br/> TACCGCTGTATCAGCAGCTGAAGGCCGAATTTCCGGAAGTGCAGGCGGTCAAC<br/> GCCATGTACACCCATGGTCTGCTGGCGATCATCTCCACCAAAAAACGCTACGGC<br/> GGTTTTGCCCGCGCGGTGGGCCTGCGGGCGATGACCACTCCCCACGGCCTCGG<br/> CTATGTGAAGATGGTGATCATGGTTGATGAAGACGTGACCCGTTCAACCTGCC<br/> GCAGGTGATGTGGGCGCTCTCCTCGAAGGTTAACCCGGCGGGAGATCTGGTGC<br/> AGTTGCCGAACATGTCGGTCTTGAAC TTGACCCAGGCTCCAGCCCGGCAGGC<br/> ATTACCGACAAACTGATTATCGACGCCACCACCCCGGTTGCGCCGGACCTTCGC<br/> GGTCACTACAGCCAGCCGGTGCAGGATCTGCCGAAACCAAGCCTGGGCTG<br/> AAAAACTGACCGCTATGCTGGCCAACCGTAAATAA</p>                                                                               |
| <i>KpdD</i> | <p>ATGATTTGTCCACGTTGCGCCGATGAAAAGATTGAAGTCATGGCGACCTCGCCG<br/> GTGAAAGGGGTCTGGACCGTGTATCAGTGCCAGCACTGTCTTTACACCTGGCG<br/> AGATACCGAGCCGCTGCGCCGCACCAGCCGCGAACACTATCCGGAAGCGTTCC<br/> GCATGACGCAGAAAGATATCGATGAGGCGCCGAGGTGCCGCACGTACCGCCG<br/> CTATTGCCGGAAGATAAGCGTTAA</p>                                                                                                                                                                                                                                                                                                                                                                                                                                                                                                                                                                                                                                                                                                                                                                                                                                                                                                                                                             |
| <i>tpl</i>  | <p>ATGAATTATCCGGCAGAACCCTTCCGTATTAAGCGTTGAAACTGTATCTATGA<br/> TCCC CGTGATGAACGCCTTAAGAAAATGCAGGAAGCGGGATAACAATACTTTCC<br/> TGTTAAATTCGAAAGATATTTATATTGACCTGCTGACAGACAGTGGCACTAACG<br/> CAATGAGCGACAAGCAGTGGGCCGCGCATGATGATGGGTGATGAAGCCTACCGG<br/> GGCAGCGAAAACCTTCTATCATCTGGAAAGAACCGTGCAGGAACTGTTTGGCTT<br/> TAAACATATTGTTCTACTCACCAGGGGCGCGGCGCAGAAAACCTGTTATCGCA<br/> GCTGGCAATTAACCGGGGCAATATGTTGCCGGGAATATGTATTTACTACTACC<br/> CGTTATCACCAGGAAAAAAATGGTGCGGTGTGTTGTCGATATCGTTCGTGACGAA<br/> GCCACGATGCCGGTCTGAATATTGCTTTTAAAGGTGATATCGATCTTAAAAAAT<br/> TACAAAAACTGATTGATGAAAAAGGCGCCGAGAATATTGCCTATATTTGCCTGG<br/> CAGTCACGGTTAACCTCGCAGGCGGGCAGCCGGTTTCCATGGCTAACATGCGC<br/> GCCGTGCGTGAAC TACTGCAGCACATGGCATTAAAGTGTCTACGACGCTAC<br/> CCGCTGCGTAGAAAACGCCTACTTTATCAAAGAGCAAGAGCAGGGCTTTGAGA<br/> ACAAGAGCATCGCAGAGATCGTGCATGAGATGTTTACGCTACGCCGACGGTTGT<br/> ACCATGAGTGGTAAAAAAGACTGTCTGGTGAATATCGGCGGCTTCTGTGCATG<br/> AACGATGACGAAATGTTCTCTTCTGCCAAAGAGTTAGTCGTTGTCTACGAAGGC<br/> ATGCCATCTTACGGCGGCCTGGCCGACGCGACATGGAAGCCATGGCGATTGG<br/> TCTGCGCGAAGCCATGCAGTATGAGTACATCGAGCACCGCGTGAAGCAGGTTT<br/> GCTATCTGGGCGACAAGCTGAAAGCCGCTGGTGTACCGATTGTTGAACCGGTG<br/> GGCGGTGATGCGGTATTCCTCGATGCGCGTTCGTTCTGTGAGCATCTGACGCAG</p> |

|                   |                                                                                                                                                                                                                                                                                                                                                                                                                                                                                                                                                                                                                                                                                                                                                                                                                                                                                                                                                                                                                                                                                                                                                                                                                                                                                                                                                                                                                                                                                                                                                                           |
|-------------------|---------------------------------------------------------------------------------------------------------------------------------------------------------------------------------------------------------------------------------------------------------------------------------------------------------------------------------------------------------------------------------------------------------------------------------------------------------------------------------------------------------------------------------------------------------------------------------------------------------------------------------------------------------------------------------------------------------------------------------------------------------------------------------------------------------------------------------------------------------------------------------------------------------------------------------------------------------------------------------------------------------------------------------------------------------------------------------------------------------------------------------------------------------------------------------------------------------------------------------------------------------------------------------------------------------------------------------------------------------------------------------------------------------------------------------------------------------------------------------------------------------------------------------------------------------------------------|
|                   | <p>GACGAGTTCCTGGCGCAAAGCCTGGCTGCCAGTATCTATGTGGAAACCGGCGT<br/> ACGTAGTATGGAGCGCGGAATTATCTCTGCGGGCCGTAATAACGTGACTGGTGA<br/> ACACCACAGGCCGAAACTGGAAACCGTGCCTGACTATTCCACGCCGCGTTT<br/> ATACTTACGCGCATATGGATGTAGTGGCTGACGGTATTATTAACCTTACCAGCA<br/> CAAAGAAGATATTCGCGGGCTGAAGTTTATTTACGAGCCGAAGCAGCTCCGTTT<br/> CTTTACTGCACGCTTTGACTATATCTAA</p>                                                                                                                                                                                                                                                                                                                                                                                                                                                                                                                                                                                                                                                                                                                                                                                                                                                                                                                                                                                                                                                                                                                                                                                                                               |
| <i>tpl(M379V)</i> | <p>ATGAATTATCCGGCAGAACCCTTCCGTATTAAGCGTTGAAACTGTATCTATGA<br/> TCCCGCGTGATGAACGCCTTAAGAAAATGCAGGAAGCGGGATAACAATACTTTCC<br/> TGTTAAATTCGAAAGATATTTATATTGACCTGCTGACAGACAGTGGCACTAACG<br/> CAATGAGCGACAAGCAGTGGGCCGGCATGATGATGGGTGATGAAGCTACGCG<br/> GGCAGCGAAAACCTTCTATCATCTGGAAAGAACCGTGCAGGAAGTGTGGCTT<br/> TAAACATATTGTTCTACTCACCAGGGGCGCGGCGCAGAAAACCTGTTATCGCA<br/> GCTGGCAATTAACCGGGGCAATATGTTGCCGGGAATATGTATTTCACTACTACC<br/> CGTTATCACCAGGAAAAAATGGTGCGGTGTGTTGTCGATATCGTTCGTGACGAA<br/> GCGCACGATGCCGGTCTGAATATTGCTTTTAAAGGTGATATCGATCTTAAAAAAT<br/> TACAAAACTGATTGATGAAAAAGGCGCCGAGAATATTGCCATATTTGCCTGG<br/> CAGTCACGGTTAACCTCGCAGGCGGGCAGCCGGTTTCCATGGCTAACATGCGC<br/> GCGGTGCGTGAAGTACTGCAGCACATGGCATTAAAGTGTCTACGACGCTAC<br/> CCGCTGCGTAGAAAACGCCTACTTTATCAAAGAGCAAGAGCAGGGCTTTGAGA<br/> ACAAGAGCATCGCAGAGATCGTGCATGAGATGTTTACGCTACGCCGACGGTGT<br/> ACCATGAGTGGTAAAAAAGACTGTCTGGTGAATATCGGCGGCTTCTGTGCATG<br/> AACGATGACGAAATGTTCTTCTGCCAAAGAGTTAGTCGTTGTCTACGAAGGC<br/> ATGCCATCTTACGGCGGCCTGGCCGGACGCGACATGGAAGCCATGGCGATTGG<br/> TCTGCGCGAAGCCATGCAGTATGAGTACATCGAGCACCAGCGTGAAGCAGGTTT<br/> GCTATCTGGGCGACAAGCTGAAAGCCGCTGGTGTACCGATTGTTGAACCGGTG<br/> GGCGGTGATGCCGTTTCTCGATGCGCGTTCGCTTCTGTGAGCATCTGACGCAG<br/> GACGAGTTCCTGGCGCAAAGCCTGGCTGCCAGTATCTATGTGGAAACCGGCGT<br/> ACGTAGTGTGGAGCGCGGAATTATCTCTGCGGGCCGTAATAACGTGACTGGTGA<br/> ACACCACAGGCCGAAACTGGAAACCGTGCCTGACTATTCCACGCCGCGTTT<br/> ATACTTACGCGCATATGGATGTAGTGGCTGACGGTATTATTAACCTTACCAGCA<br/> CAAAGAAGATATTCGCGGGCTGAAGTTTATTTACGAGCCGAAGCAGCTCCGTTT<br/> CTTTACTGCACGCTTTGACTATATCTAA</p> |

## References

1. T. S. Lee, R. A. Krupa, F. Zhang, M. Hajimorad, W. J. Holtz, N. Prasad, S. K. Lee and J. D. Keasling, *J. Biol. Eng.*, 2011, **5**, 1-14.
2. Y. Jiang, B. Chen, C. Duan, B. Sun, J. Yang, S. Yang and R. M. Kelly, *Appl. Environ. Microbiol.*, 2015, **81**, 2506-2514.
